# Supplementary material for: Experience with Rifabutin-Containing Therapy in 500 Patients from the European Registry on Helicobacter pylori Management (Hp-EuReg)
Source: MDPI journal article supplement (doi:10.3390/jcm11061658), 2022-03-16
Supplement: s1 [file s1]

**Supplementary Table S1.** Effectiveness of both triple therapy with amoxicillin and rifabutin and quadruple therapy with amoxicillin, rifabutin and bismuth, according to duration, potency of acid inhibition and treatment line.

| Line*                | Length (days) | PPI dose | Treatment | ITT, N (%) | 95%CI     | Effectiveness |           |            |           |
|----------------------|---------------|----------|-----------|------------|-----------|---------------|-----------|------------|-----------|
|                      |               |          |           |            |           | mITT, N (%)   | 95%CI     | PP, N (%)  | 95%CI     |
| 2 <sup>nd</sup> line | 10            | low      | PPI+A+R   | 7 (71.4)   | 29.0-96.3 | 7 (71.4)      | 29.0-96.3 | 7 (71.4)   | 29.0-96.3 |
|                      |               | standard | PPI+A+R   | 2 (50.0)   | 1.2-98.7  | 2 (50.0)      | 1.2-98.7  | 2 (50.0)   | 1.2-98.7  |
|                      |               | high     | PPI+A+R   | 8 (75.0)   | 34.9-96.8 | 7 (85.7)      | 42.1-99.6 | 7 (85.7)   | 42.1-99.6 |
|                      |               | total    | PPI+A+R   | 17 (70.6)  | 44.0-89.6 | 16 (75.0)     | 47.6-92.7 | 16 (75.0)  | 47.6-92.7 |
|                      | 12            | low      | PPI+A+R   | 59 (57.6)  | 44.1-71.1 | 52 (65.4)     | 51.4-79.2 | 52 (65.4)  | 51.4-79.2 |
|                      |               | high     | PPI+A+R   | 72 (76.4)  | 65.8-86.8 | 60 (91.7)     | 81.6-97.2 | 58 (93.1)  | 83.3-98.1 |
|                      |               | total    | PPI+A+R   | 131 (67.9) | 59.5-76.3 | 112 (79.5)    | 71.5-87.3 | 110 (80.0) | 72.1-87.9 |
|                      | 14            | low      | PPI+A+R   | 5 (40.0)   | 5.3-85.3  | 5 (40.0)      | 5.3-85.3  | 5 (40.0)   | 5.3-85.3  |
|                      | Total         | low      | PPI+A+R   | 71 (57.7)  | 45.5-69.9 | 64 (64.1)     | 51.5-76.6 | 64 (64.1)  | 51.5-76.6 |
|                      |               | standard | PPI+A+R   | 2 (50.0)   | 1.2-98.7  | 2 (50.0)      | 1.2-98.7  | 2 (50.0)   | 1.2-98.7  |
|                      |               | high     | PPI+A+R   | 80 (76.3)  | 66.3-86.2 | 67 (91)       | 83.4-98.6 | 65 (92.3)  | 82.9-97.4 |
|                      |               | total    | PPI+A+R   | 153 (67.3) | 59.5-75.1 | 133 (77.4)    | 69.9-84.9 | 131 (77.9) | 70.4-85.3 |
| 3 <sup>rd</sup> line | 10            | low      | PPI+A+R   | 4 (100)    | 39.7-100  | 4 (100)       | 39.7-100  | 4 (100)    | 39.7-100  |
|                      |               | standard | PPI+A+R   | 2 (50.0)   | 1.2-98.7  | 2 (50.0)      | 1.2-98.7  | 2 (50.0)   | 1.2-98.7  |
|                      |               | high     | PPI+A+R   | 2 (50.0)   | 1.2-98.7  | 1 (100)       | 1.2-98.7  | 1 (100)    | 1.2-98.7  |
|                      |               | total    | PPI+A+R   | 8 (75.0)   | 34.9-96.8 | 7 (85.7)      | 42.1-99.6 | 7 (85.7)   | 42.1-99.6 |
|                      | 12            | low      | PPI+A+R   | 40 (67.5)  | 51.7-83.2 | 35 (77.1)     | 61.8-92.4 | 35 (77.1)  | 61.8-92.4 |
|                      |               | high     | PPI+A+R   | 42 (66.7)  | 51.2-82.1 | 32 (87.5)     | 71.0-96.4 | 31 (87.1)  | 70.2-96.4 |
|                      |               | total    | PPI+A+R   | 82 (67.1)  | 56.3-77.8 | 67 (82.1)     | 72.1-92.0 | 66 (81.8)  | 71.7-91.8 |
|                      | 14            | low      | PPI+A+R   | 6 (0.0)    | 0.0-45.9  | 4 (0.0)       | 0.0-60.2  | 3 (0.0)    | 0.0-70.8  |
|                      |               |          | PPI+A+R+B | 1 (100)    | 1.2-98.7  | 1 (100)       | 1.2-98.7  | 1 (100)    | 1.2-98.7  |
|                      |               | standard | PPI+A+R+B | 2 (100)    | 15.8-100  | 2 (100)       | 15.8-100  | 2 (100)    | 15.8-100  |
|                      |               | high     | PPI+A+R   | 11 (36.4)  | 10.9-69.2 | 5 (80.0)      | 28.3-99.5 | 5 (80.0)   | 28.3-99.5 |
|                      |               | total    | PPI+A+R   | 17 (23.5)  | 6.8-49.8  | 9 (44.4)      | 13.7-78.8 | 8 (50.0)   | 15.7-84.3 |
|                      |               |          | PPI+A+R+B | 3 (100)    | 29.2-100  | 3 (100)       | 29.2-100  | 3 (100)    | 29.2-100  |
|                      | Total         | low      | PPI+A+R   | 50 (62.0)  | 47.5-76.4 | 43 (72.1)     | 57.5-86.6 | 42 (73.8)  | 59.3-88.3 |
|                      |               |          | PPI+A+R+B | 1 (100)    | 1.2-98.7  | 1 (100)       | 1.2-98.7  | 1 (100)    | 1.2-98.7  |
|                      |               | standard | PPI+A+R   | 2 (50.0)   | 1.2-98.7  | 2 (50)        | 1.2-98.7  | 2 (50.0)   | 1.2-98.7  |
|                      |               |          | PPI+A+R+B | 2 (100)    | 15.8-100  | 2 (100)       | 15.8-100  | 2 (100)    | 15.8-100  |
|                      |               | high     | PPI+A+R   | 55 (60.0)  | 46.1-73.8 | 38 (86.8)     | 71.9-95.6 | 37 (86.5)  | 71.2-95.4 |
|                      |               | total    | PPI+A+R   | 107 (60.7) | 51.0-70.5 | 83 (78.3)     | 68.8-87.8 | 81 (79.0)  | 69.5-88.5 |
| 4 <sup>th</sup> line | 10            | low      | PPI+A+R   | 22 (50.0)  | 26.8-73.2 | 21 (52.4)     | 28.6-76.1 | 20 (55)    | 31.5-76.9 |
|                      |               |          | PPI+A+R+B | 2 (50.0)   | 1.2-98.7  | 2 (50.0)      | 1.2-98.7  | 2 (50.0)   | 1.2-98.7  |
|                      |               | standard | PPI+A+R   | 15 (73.3)  | 44.9-92.2 | 15 (73.3)     | 44.9-92.2 | 14 (78.6)  | 49.2-95.3 |
|                      |               | high     | PPI+A+R   | 6 (83.3)   | 35.9-99.6 | 5 (100)       | 47.8-100  | 5 (100)    | 47.8-100  |
|                      |               |          | PPI+A+R+B | 19 (68.4)  | 43.4-87.4 | 19 (68.4)     | 43.4-87.4 | 18 (66.7)  | 40.9-86.6 |
|                      |               | total    | PPI+A+R   | 43 (62.8)  | 47.2-78.4 | 41 (65.9)     | 50.1-81.6 | 39 (69.2)  | 53.4-84.9 |
|                      |               |          | PPI+A+R+B | 21 (66.7)  | 43.0-85.4 | 21 (66.7)     | 43.0-85.4 | 20 (65)    | 40.7-84.6 |
|                      | 12            | low      | PPI+A+R   | 12 (58.3)  | 27.6-84.8 | 10 (70.0)     | 34.7-93.3 | 10 (70.0)  | 34.7-93.3 |
|                      |               | high     | PPI+A+R   | 11 (72.7)  | 39.0-93.9 | 9 (88.9)      | 51.7-99.7 | 9 (88.9)   | 51.7-99.7 |
|                      |               | total    | PPI+A+R   | 23 (65.2)  | 43.6-86.8 | 19 (78.9)     | 54.4-93.9 | 19 (78.9)  | 54.4-93.9 |
|                      | 14            | low      | PPI+A+R   | 6 (66.7)   | 22.2-95.6 | 6 (66.7)      | 22.2-95.6 | 6 (66.7)   | 22.2-95.6 |

|              |                 |                  |           |           |           |           |           |           |
|--------------|-----------------|------------------|-----------|-----------|-----------|-----------|-----------|-----------|
| <b>Total</b> | <b>standard</b> | <b>PPI+A+R</b>   | 3 (33.3)  | 0.8-90.6  | 2 (50.0)  | 1.2-98.7  | 2 (50.0)  | 1.2-98.7  |
|              | <b>high</b>     | <b>PPI+A+R</b>   | 21 (14.3) | 3.0-36.3  | 8 (37.5)  | 8.5-75.5  | 7 (42.9)  | 9.8-81.5  |
|              | <b>total</b>    | <b>PPI+A+R</b>   | 30 (26.7) | 9.2-44.1  | 16 (50.0) | 24.6-75.3 | 15 (53.3) | 26.6-78.7 |
|              | <b>low</b>      | <b>PPI+A+R</b>   | 40 (55.0) | 38.3-71.7 | 37 (59.5) | 42.2-76.6 | 36 (61.1) | 43.7-78.4 |
|              |                 | <b>PPI+A+R+B</b> | 2 (50.0)  | 1.2-98.7  | 2 (50.0)  | 1.2-98.7  | 2 (50.0)  | 1.2-98.7  |
|              | <b>standard</b> | <b>PPI+A+R</b>   | 18 (66.7) | 40.9-86.6 | 17 (70.6) | 44.0-89.6 | 16 (75.0) | 47.6-92.7 |
|              | <b>high</b>     | <b>PPI+A+R</b>   | 38 (42.1) | 25.1-59.1 | 22 (72.7) | 49.7-89.2 | 21 (76.2) | 52.8-91.8 |
|              |                 | <b>PPI+A+R+B</b> | 19 (68.4) | 43.4-87.4 | 19 (68.4) | 43.4-87.4 | 18 (66.7) | 40.9-86.6 |
|              | <b>total</b>    | <b>PPI+A+R</b>   | 96 (52.1) | 41.6-62.6 | 76 (65.8) | 54.4-77.1 | 73 (68.5) | 57.1-79.8 |
|              |                 | <b>PPI+A+R+B</b> | 21 (66.7) | 43.0-85.4 | 21 (66.7) | 43.0-85.4 | 20 (65.0) | 40.7-84.6 |

A: amoxicillin; B: bismuth; R: rifabutin; ITT: intention-to-treat ; PPI: proton pump inhibitor (low-dose PPI: 4.5–27 mg omeprazole equivalents (OE) twice daily (bid) (i.e., 20 mg OE bid), standard-dose PPI: 32–40 mg omeprazole equivalents bid (i.e., 40 mg OE bid), high-dose PPI: 54–128 mg omeprazole equivalents bid (i.e., 60 mg OE bid); mITT: modified intention-to-treat; PP: per protocol, CI: confidence interval, N: total number of patients analysed; \*the remaining treatment lines were not reported, as less than 5 patients were included in each subgroup.
